# Supplementary material
Source: PubMed Central journal article supplement (PMC9677559)
Supplement: mmc5.pdf [file mmc5.pdf]

Supplemental Figure 5

**A**



**B**



**C**



**D**
