# Supplementary material
Source: PubMed Central journal article supplement (PMC9677559)

Supplemental Figure 1

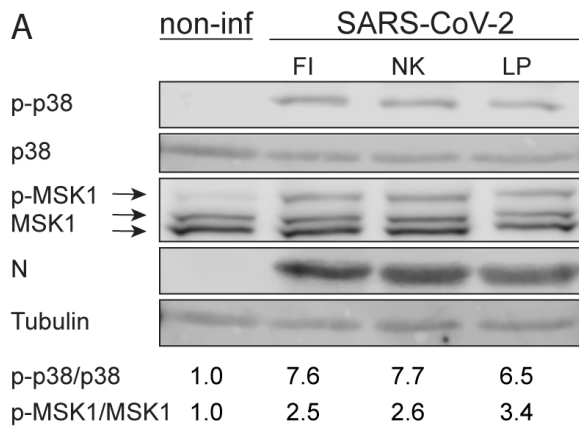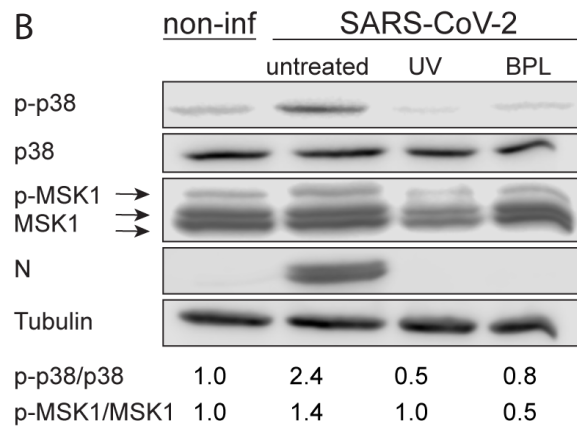

Supplement: mmc1.pdf [file mmc1.pdf]

# Supplemental Figure 2

## A

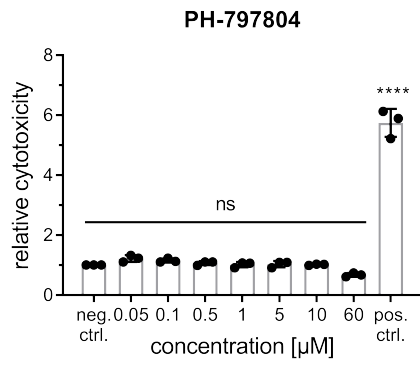

## B

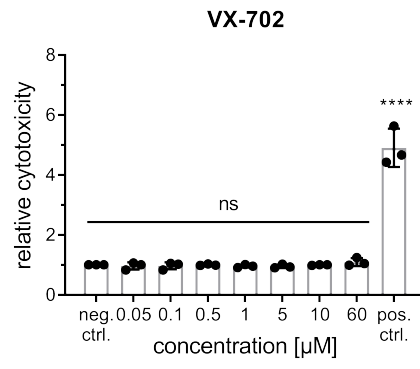

Supplement: mmc2.pdf [file mmc2.pdf]

Supplemental Figure 3

A

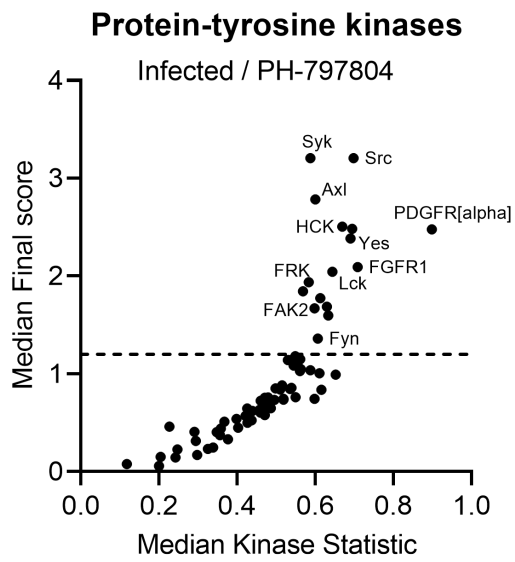

B

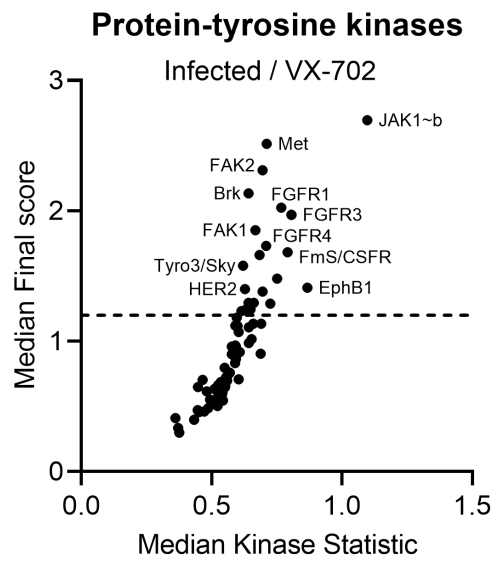

Supplement: mmc3.pdf [file mmc3.pdf]

Supplemental Figure 4

A

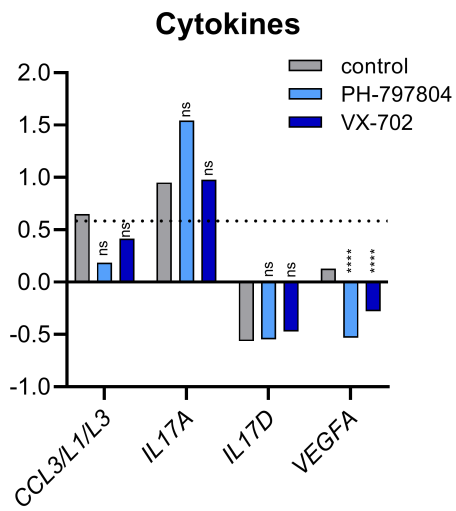

B

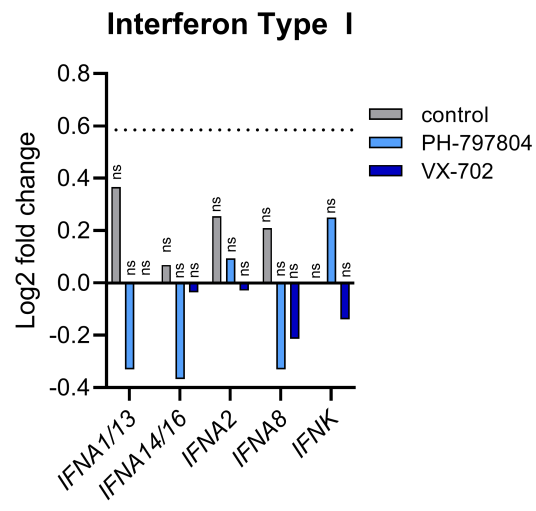

C

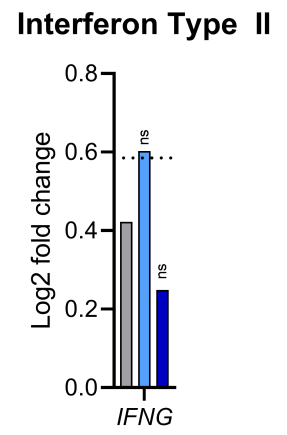

D

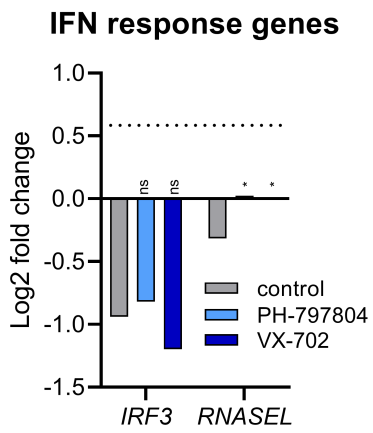

Supplement: mmc4.pdf [file mmc4.pdf]
